# Supplementary material
Source: PubMed Central journal article supplement (PMC3793603)
Supplement: supp_M037812_jlr.M037812-1.pdf [file supp_M037812_jlr.M037812-1.pdf]

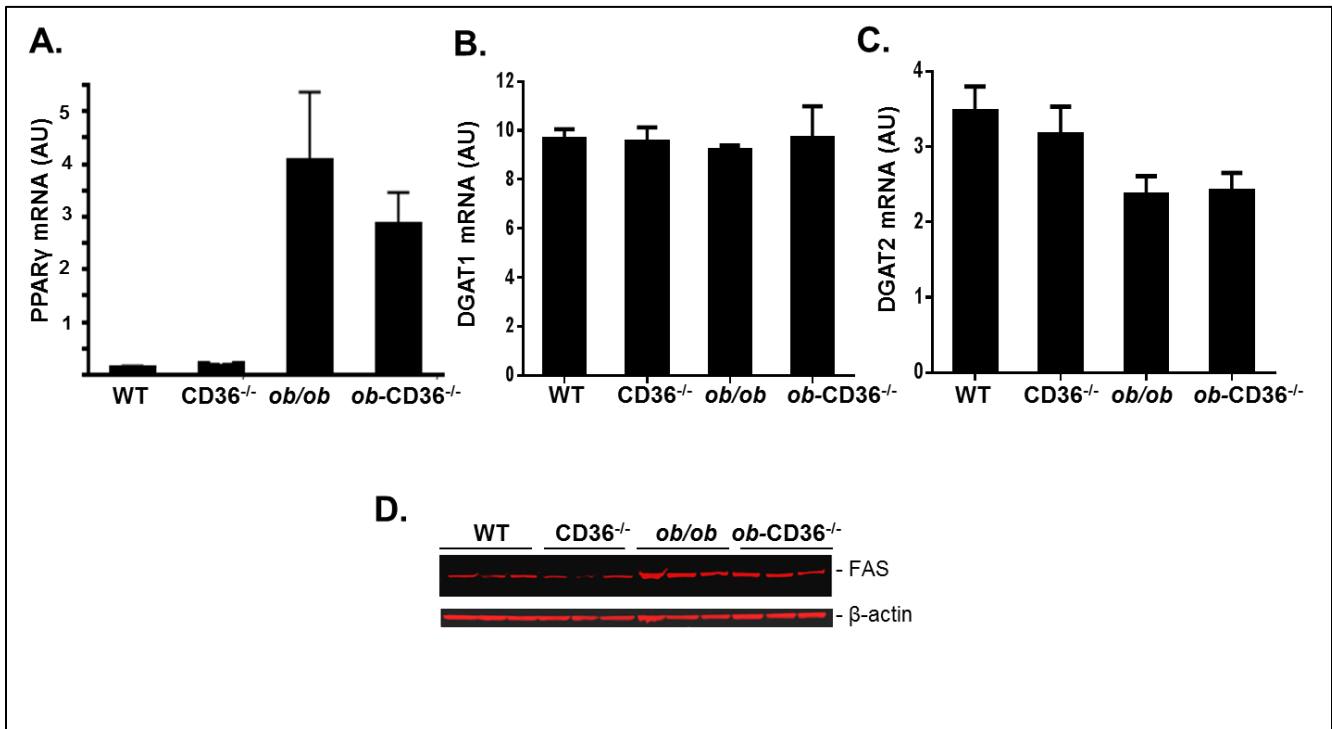

**Supplement Fig. 1.** Effect of CD36 deletion on hepatic gene expression of **A)** PPAR $\gamma$ , **B)** DAGT1, **C)** DGAT2 and **D)** Western blot showing hepatic protein levels of the fatty acid synthase (FAS) enzyme. PPAR $\gamma$ , DAGT1 and DGAT2 mRNA levels were determined by real time PCR using the primers listed under Methods. Data are means, n=4 mice/group,  $\pm$  se, \*P<0.05. FAS levels were determined by probing with rabbit anti FAS antibody (Abcam) and signals were detected using near-infrared labeled secondary antibodies and the LI-COR imaging system (Odyssey, Lincoln, NA).
